# Supplementary material
Source: Springer Nature journal article supplement (https://www.springermedizin.de/resource/supplementary/13054_2011_9900_MOESM4_ESM.pdf/9708440)

Controls

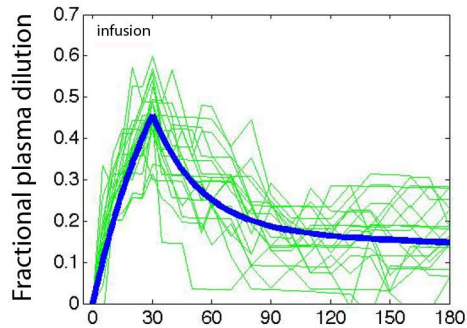

Esmolol

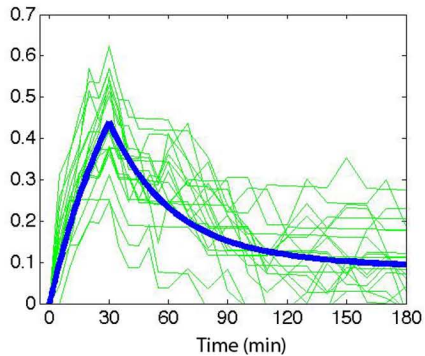

Phenylephrine

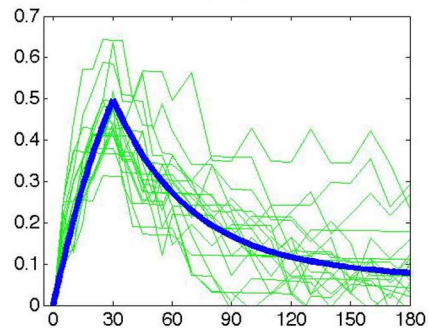

Supplement: MOESM4 [file 9708440]
